# Supplementary material for: Pt-loaded Au@CeO2 core–shell nanocatalysts for improving methanol oxidation reaction activity
Source: Royal Society of Chemistry journal article supplement (doi:10.1039/c9ta09333h), 2019-01-01
Supplement: c9ta09333h1.pdf [file c9ta09333h1.pdf]

## Supplementary Information

### **Pt-loaded Au@CeO<sub>2</sub> core-shell nanocatalysts for improving methanol oxidation reaction activity**

Dung Van Dao,<sup>a,b</sup> Thanh Duc Le,<sup>b</sup> Ganpurev Adilbish,<sup>b</sup> In-Hwan Lee<sup>\*c</sup> and Yeon-Tae Yu,<sup>\*b</sup>

<sup>a</sup> Institute of Research and Development, Duy Tan University, Danang 550000, Vietnam

<sup>b</sup> Division of Advanced Materials Engineering and Research Center for Advanced Materials

Development, Chonbuk National University, Jeonju 54896, South Korea. E-mail:

yeontae@jbnu.ac.kr

<sup>c</sup> Department of Materials Science and Engineering, Korea University, Seoul 02841, South Korea.

E-mail: ihlee@korea.ac.kr

## **Additional experimental section**

### ***Synthesis of pure CeO<sub>2</sub>***

Firstly, 1.5 g Ce(NO<sub>3</sub>)<sub>3</sub>·6H<sub>2</sub>O was added to 40 mL of 1 M Na<sub>2</sub>CO<sub>3</sub> aqueous solution. The mixture was magnetically stirred for 30 min and transferred into a 50 mL teflon-lined stainless steel autoclave. The autoclave was heated to 180°C and maintained for 24 h. Next, the precipitate was separated by centrifugation at 10,000 RPM for 5 min. The obtained material was washed several times with distilled water and absolute ethanol to wholly remove redundant components and then dried at 80°C in air for 1 h, successively. Finally, the powder was calcined at 500°C in air for 2 h to obtain pure CeO<sub>2</sub> nanoparticles.

### ***Synthesis of pure CeO<sub>2</sub>@Pt***

Firstly, 10 mg of the obtained pure CeO<sub>2</sub> powder was dispersed in 30 mL of distilled water and sonicated for 10 min. Then, 0.8 mL of 0.1 M H<sub>2</sub>PtCl<sub>6</sub> solution was added and stirred for 10 min at room temperature. Next, 14.4 mL of 0.034 M tri-sodium citrate solution was injected to above suspension. The obtaining solution was heated at 90°C for 4 h, then cooled to room temperature naturally. The color of as-prepared suspension trends to brown. After that, the CeO<sub>2</sub>@Pt precipitate was collected by the centrifugation at 18,000 RPM for 30 min to completely separate unnecessary components. Finally, the collected powders were washed with distilled water and absolute ethanol several times, and calcined at 500°C, with the increasing rate of 1°C/min, in air for 2 h to achieve CeO<sub>2</sub>@Pt core-shell nanocatalysts.

### ***Preparation of CeO<sub>2</sub>@Pt catalytic slurry***

10 mg of commercial Pt/C (40 wt.% Pt) composite catalyst was introduced into a 20 mL glass vial. Then, distilled water, 2-propanol and Nafion solution (5 wt.%, Dupont) were added to above vial, respectively. After that, the solution was ultrasonicated at room temperature for 1 h to make sure that the black catalytic slurry was uniformly obtained (Figure S1b).

### ***Preparation of CeO<sub>2</sub>@Pt electrocatalyst***

Before the spray of Pt/C catalytic slurry, 8 cm<sup>2</sup> carbon cloth substrate was firstly dried at 60°C for 1 h, then was uniformly sprayed an amount of 0.2 mL the CeO<sub>2</sub>@Pt catalytic slurry on its surface. Next, the obtained electrode was oven-dried at 60°C for overnight before use.

### ***Preparation of Pt/C catalytic slurry***

40 mg of commercial Pt/C (40 wt.% Pt) composite catalyst was introduced into a 20 mL glass vial. Then, distilled water, 2-propanol and Nafion solution (5 wt.%, Dupont) were added to above vial, respectively. After that, the solution was ultrasonicated at room temperature for 1 h to make sure that the black catalytic slurry was uniformly obtained (Figure S1c).

### **Preparation of Pt/C electrocatalyst**

Before the spray of Pt/C catalytic slurry, 8 cm<sup>2</sup> carbon cloth substrate was firstly dried at 60°C for 1 h, then was uniformly sprayed an amount of 0.2 mL the Pt/C catalytic slurry on its surface. Next, the obtained electrode was oven-dried at 60°C for overnight before use.

**Table S1** Experimental Conditions for the Working Electrocatalysts Preparation.

| Area of carbon cloth (cm <sup>2</sup> ) | Volume of Pt/C slurry (mL) | Volume of CeO <sub>2</sub> @Pt slurry (mL) | Volume of Au@CeO <sub>2</sub> @Pt slurry (mL) | Pt loading weight measured by ICP (mg/cm <sup>2</sup> ) | Electrode denotation      |
|-----------------------------------------|----------------------------|--------------------------------------------|-----------------------------------------------|---------------------------------------------------------|---------------------------|
| 8                                       | 0.2                        | 0.0                                        | 0.0                                           | 0.0543                                                  | Pt/C                      |
| 8                                       | 0.0                        | 0.5                                        | 0.0                                           | 0.0492                                                  | CeO <sub>2</sub> @Pt/C    |
| 8                                       | 0.0                        | 0.0                                        | 0.5                                           | 0.0602                                                  | Au@CeO <sub>2</sub> @Pt/C |

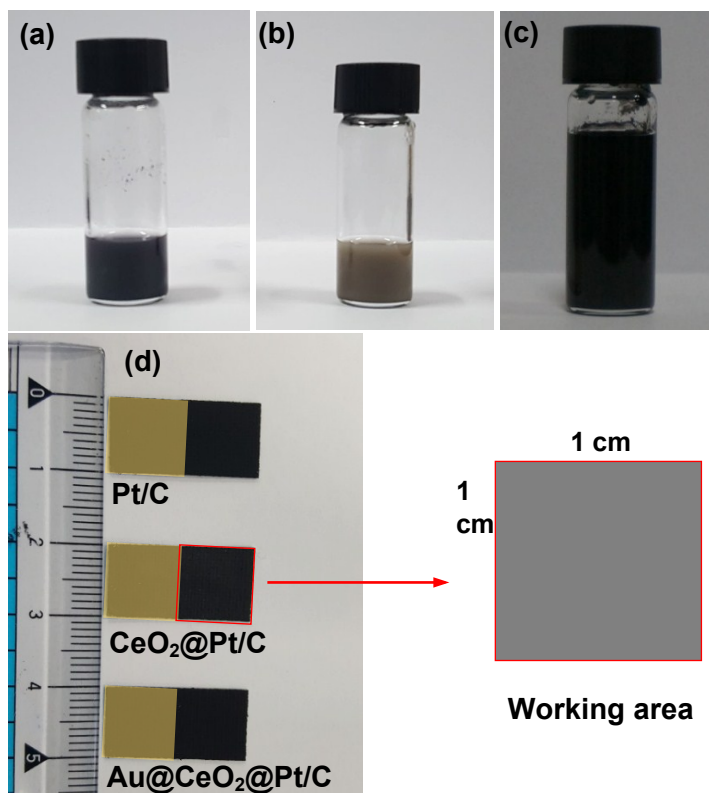

**Fig. S1** Photographs of (a) Au@CeO<sub>2</sub>@Pt, (b) CeO<sub>2</sub>@Pt, and (c) Pt/C slurry, and (d) the corresponding electrocatalysts.

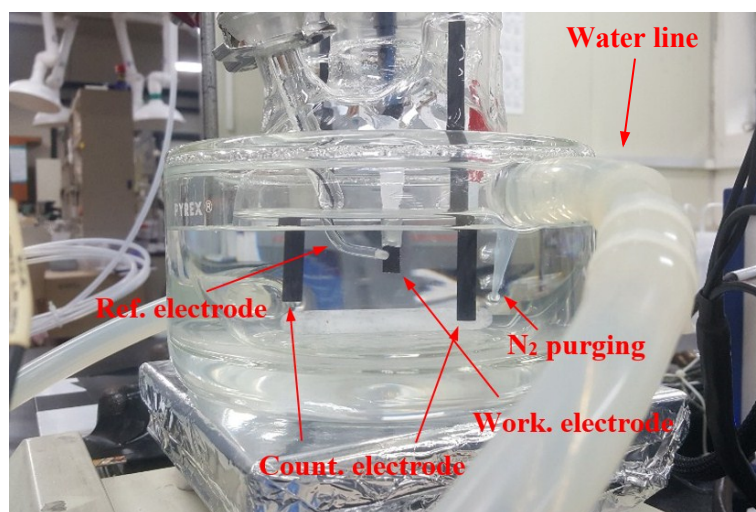

**Fig. S2** Setup for the electrochemical properties testing.

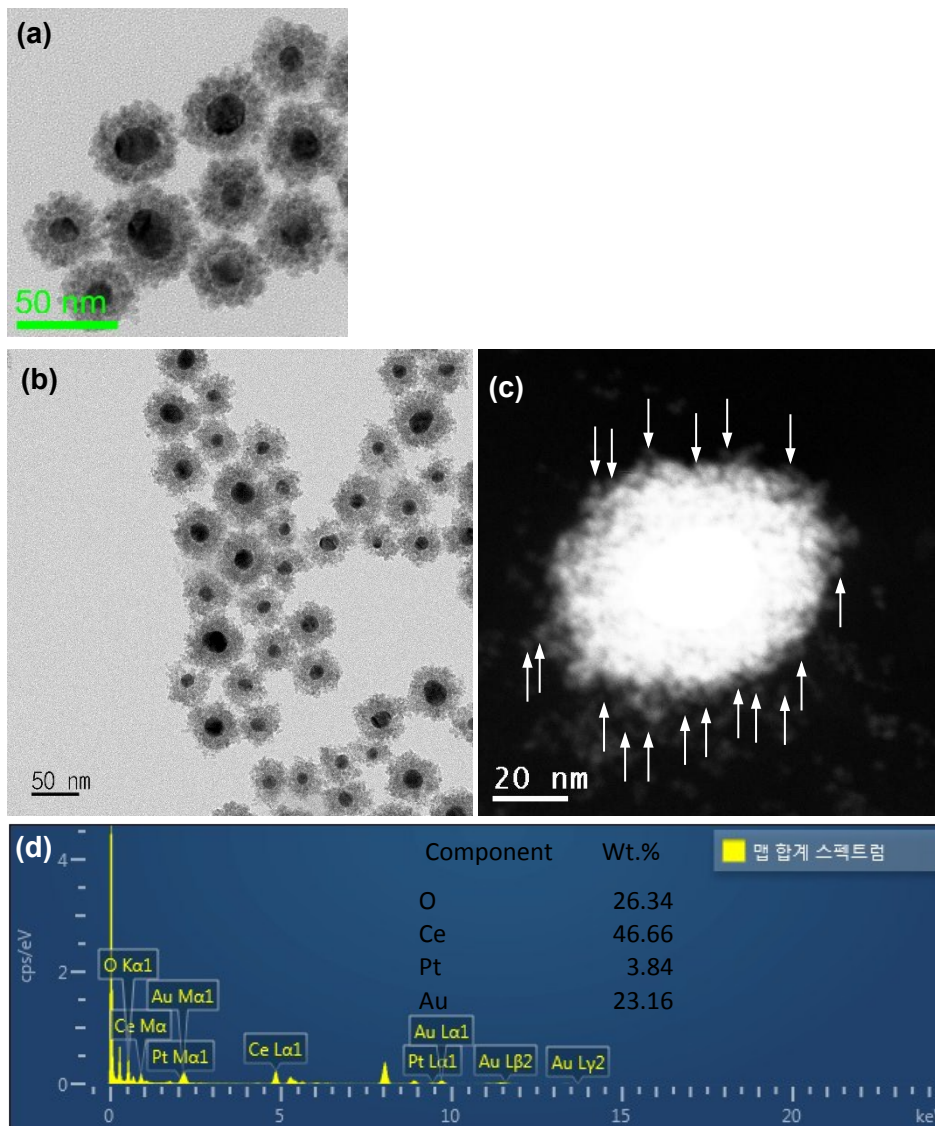

**Fig. S3** (a) HRTEM image of single Au@CeO<sub>2</sub>, (b) overall HRTEM of Au@CeO<sub>2</sub>@Pt, (c) selected particle of Au@CeO<sub>2</sub>@Pt with the presence of Pt highlighted by white arrows, (d) EDS spectrum of Au@CeO<sub>2</sub>@Pt, showing ultralow Pt loading of 3.84 wt.%.

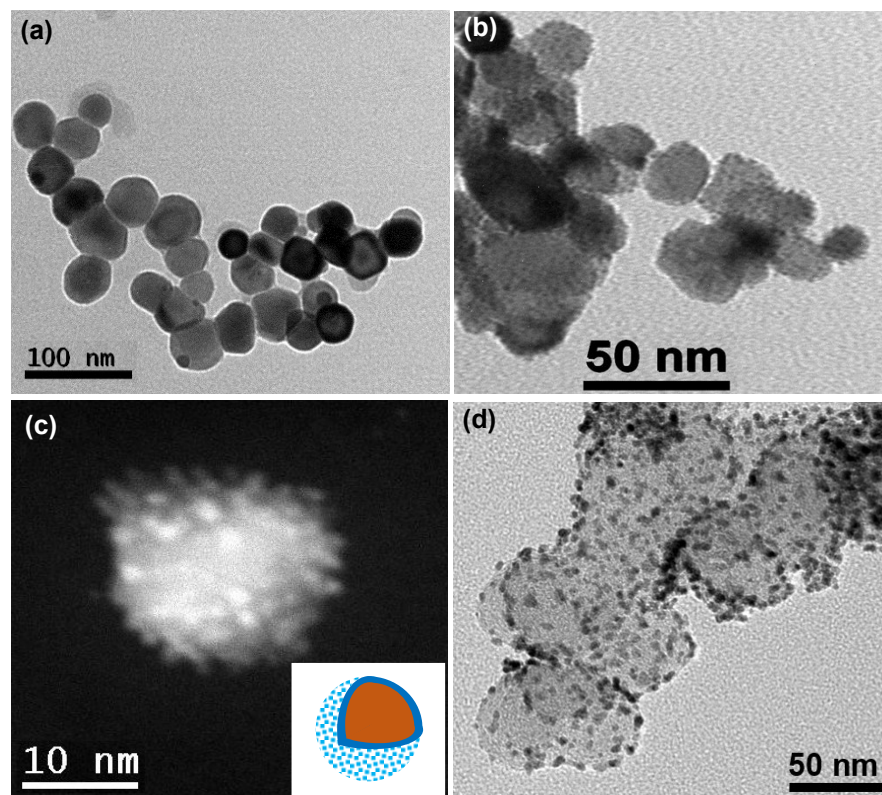

**Fig. S4** HRTEM image of CeO<sub>2</sub> (a) before and (b) after coating with Pt, (c) selected single CeO<sub>2</sub>@Pt particle, and (d) HRTEM image of Pt/C catalyst.

Fig. S4(a, b) show the HRTEM images of CeO<sub>2</sub> before and after decoration of Pt, in which, the size of CeO<sub>2</sub> supports is around 50 nm. The HRTEM of a single CeO<sub>2</sub>@Pt particle is shown in Fig. S4c, with the mean size of about 3 nm. The Pt loading is about 4.08 wt.%. Fig. S4d presents the HRTEM image of the Pt/C catalyst composite; the uniform Pt particles are well dispersed on the carbon black support. The average diameter of Pt catalyst loaded onto the surface of carbon is around 4 nm. The diameter of carbon supports is also found in the range of 40 to 70 nm.

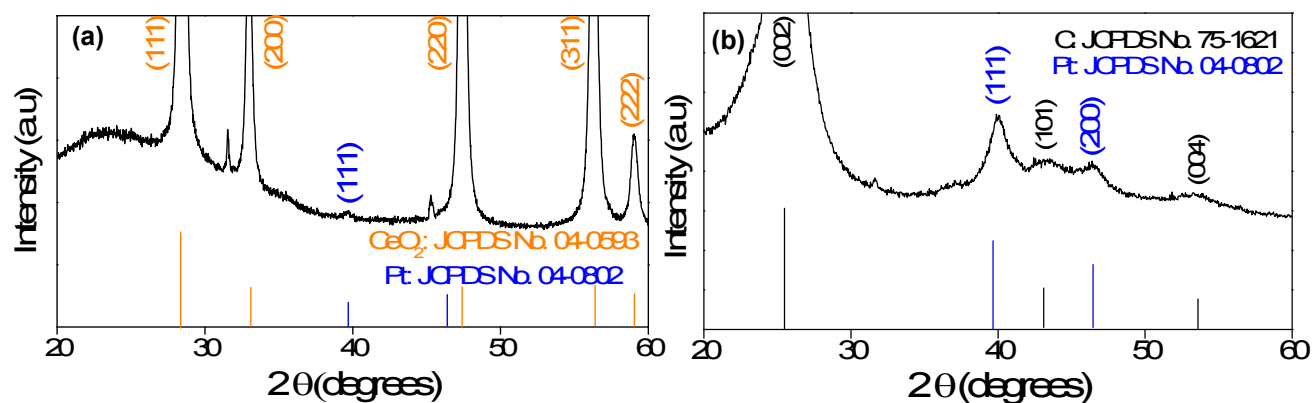

**Fig. S5** XRD patterns of (a) CeO<sub>2</sub>@Pt and (b) Pt/C catalysts.

Fig. S5(a, b) show XRD pattern of CeO<sub>2</sub>@Pt and Pt/C composites, which included Pt peaks marked with blue (well matched to JCPDS No: 04-0802), CeO<sub>2</sub> peaks marked with yellow (well matched to JCPDS No. 04-0593) and C peaks marked with black (well matched to JCPDS No. 75-1621).

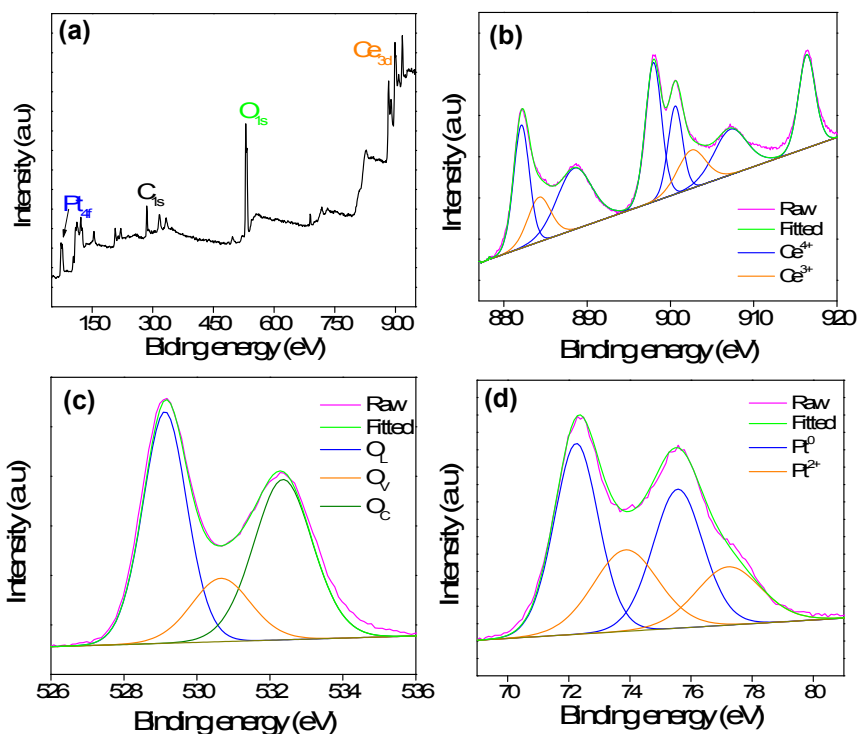

**Fig. S6** XPS analysis of CeO<sub>2</sub>@Pt catalyst: (a) full spectrum, (b) Ce 3d, (c) O 1s and (d) Pt 4f.

**Table S2** Fitting Results of Ce 3d and O 1s XPS for CeO<sub>2</sub>@Pt and Au@CeO<sub>2</sub>@Pt Catalysts

| Catalysts               | Ce <sup>3+</sup>    |                         | Oxygen                       |                     |                         |
|-------------------------|---------------------|-------------------------|------------------------------|---------------------|-------------------------|
|                         | Binding energy (eV) | Relative percentage (%) | Species                      | Binding energy (eV) | Relative percentage (%) |
| CeO <sub>2</sub> @Pt    | 884.40              | 18.56                   | O <sub>L</sub> (Ce-O)        | 529.11              | 47.64                   |
|                         | 902.80              |                         | O <sub>V</sub> (vacancy)     | 530.66              | 15.24                   |
|                         |                     |                         | O <sub>C</sub> (chemisorbed) | 532.38              | 37.12                   |
| Au@CeO <sub>2</sub> @Pt | 884.16              | 30.03                   | O <sub>L</sub> (Ce-O)        | 529.20              | 54.20                   |
|                         | 903.04              |                         | O <sub>V</sub> (vacancy)     | 530.98              | 26.46                   |
|                         |                     |                         | O <sub>C</sub> (chemisorbed) | 532.32              | 19.34                   |

**Table S3** Fitting Results of Pt 4f for CeO<sub>2</sub>@Pt and Au@CeO<sub>2</sub>@Pt Catalysts

| Catalysts               | Pt <sup>0</sup>     |                         | Pt <sup>2+</sup>    |                         |
|-------------------------|---------------------|-------------------------|---------------------|-------------------------|
|                         | Binding energy (eV) | Relative percentage (%) | Binding energy (eV) | Relative percentage (%) |
| CeO <sub>2</sub> @Pt    | 72.34               | 76.86                   | 73.86               | 23.14                   |
|                         | 75.57               |                         | 77.22               |                         |
| Au@CeO <sub>2</sub> @Pt | 72.64               | 84.36                   | 74.39               | 15.64                   |
|                         | 75.96               |                         | 77.69               |                         |



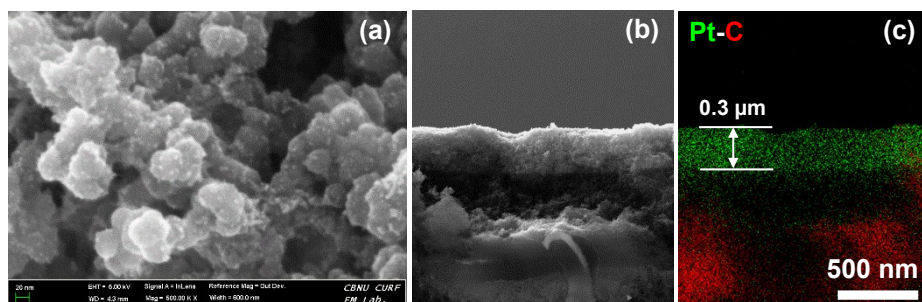

**Fig. S7** FESEM surface images of Pt/C: (a) surface, (b) cross-section and (c) EDS mapping.

Fig. S7a shows surface image of Pt/C electrode, in which, the presence of Pt loaded on carbon supports is found as white small dots, and carbon is found as grey particles. The thickness of Pt/C catalyst is observed around 0.3  $\mu\text{m}$  as given in Fig. S7b. Furthermore, the coexistence of Pt (green) and C (red) in catalytic layer is confirmed by EDS mapping in Fig. S7c as well.

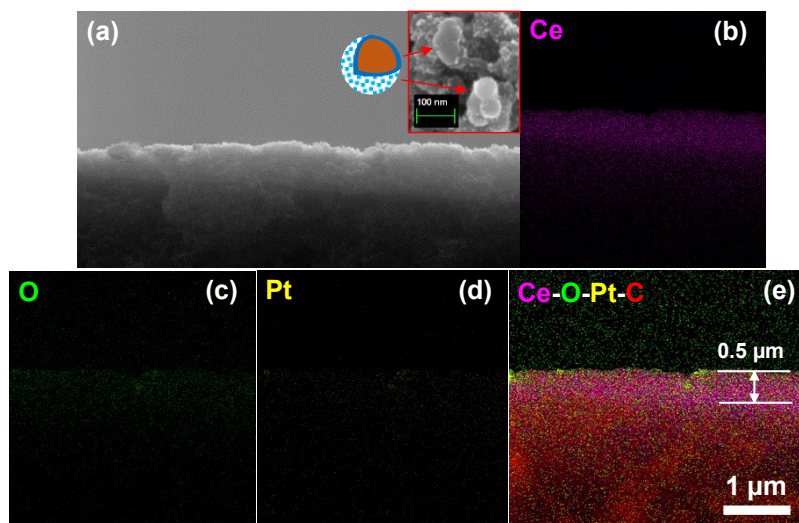

**Fig. S8** FESEM analysis of  $\text{CeO}_2@\text{Pt}/\text{C}$ : (a) cross-section, the inset showing the surface image, (b-d) EPD mapping and (e) corresponding overlay.

Fig. S8a provides cross-sectional observation of this electrode, with catalytic layer highlighted by white area, the inset shows the surface image of  $\text{CeO}_2@\text{Pt}/\text{C}$  electrode, where presence of  $\text{CeO}_2@\text{Pt}$  nanoparticles are illustrated by red arrows with the corresponding model. Mapping of Ce, O and Pt components are revealed by EDS analysis in purple, green, and yellow, respectively (Fig. S8(b-d)). The corresponding overlay is supplied in Fig. S8e, with the thickness of catalytic layer is about 0.5  $\mu\text{m}$ .

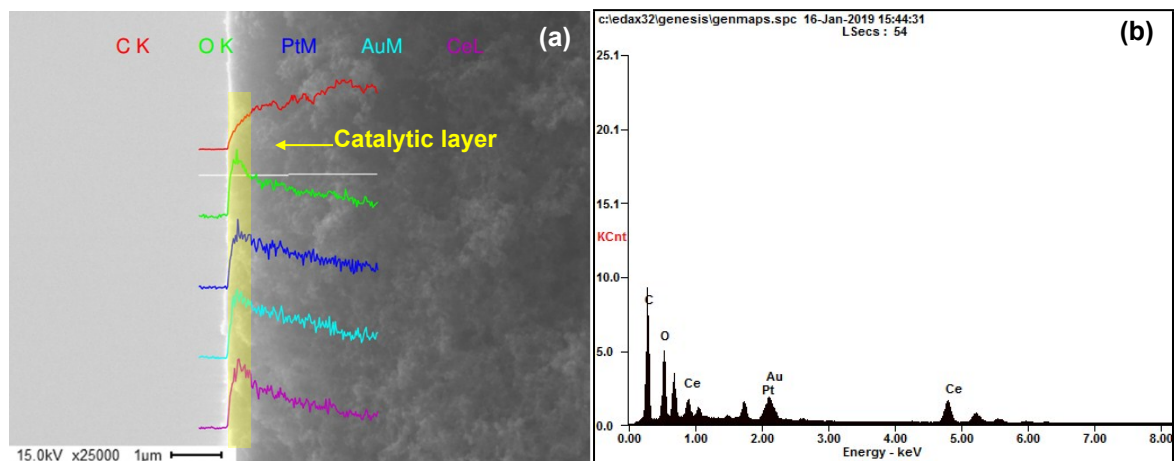

**Fig. S9** FESEM-EDS cross-sectional line-scanning and EDS spectrum profiles of Au@CeO<sub>2</sub>@Pt/C electrode.

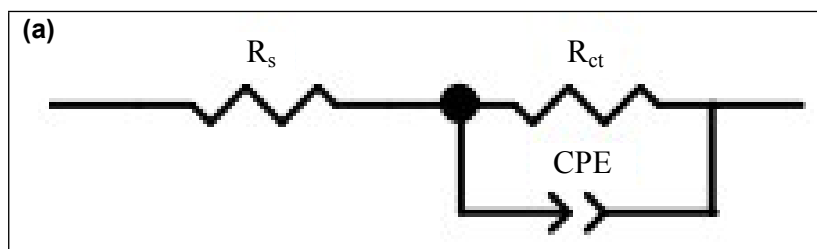

**Fig. S10** An electrical equivalent circuit used to fit the Nyquist plots:  $R_s$  indicates the solution resistance  $R_{ct}$  presents the charge transfer resistance, and CPE is a constant phase element.

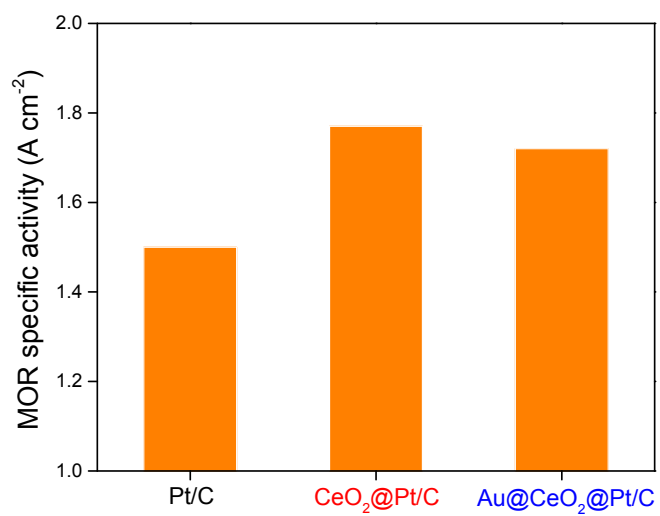

**Fig. S11** MOR specific activities of the prepared electrodes. Which were calculated by normalizing the MOR mass activity with the corresponding ECSA.

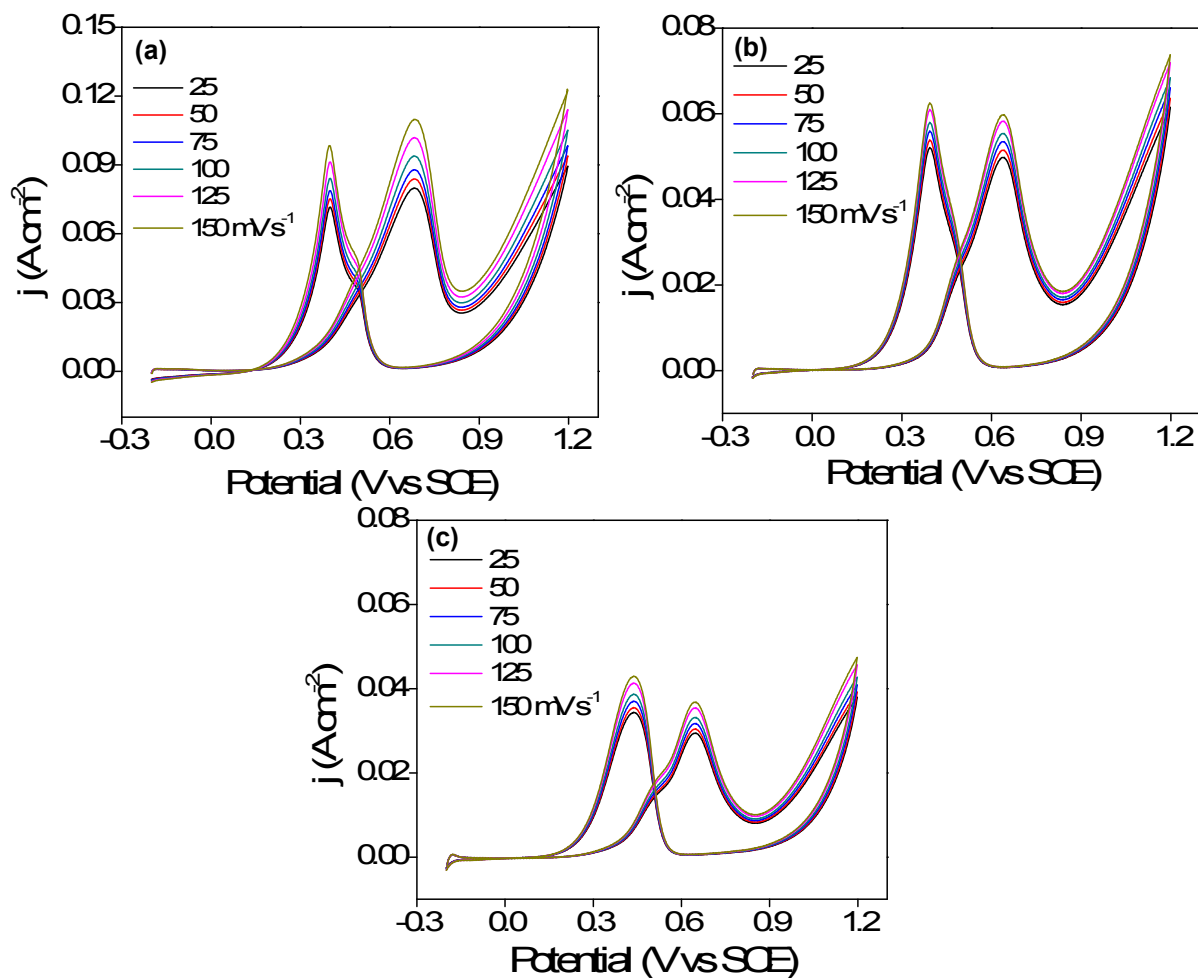

**Fig. S12** Sweep rate effect on the MOR performance of (a)  $\text{Au@CeO}_2\text{/Pt/C}$ , (b)  $\text{CeO}_2\text{/Pt/C}$  and (c)  $\text{Pt/C}$  electrodes in  $N_2$ -saturated solution of  $0.25\text{ M H}_2\text{SO}_4 + 1\text{ M CH}_3\text{OH}$  at  $25^\circ\text{C}$ .

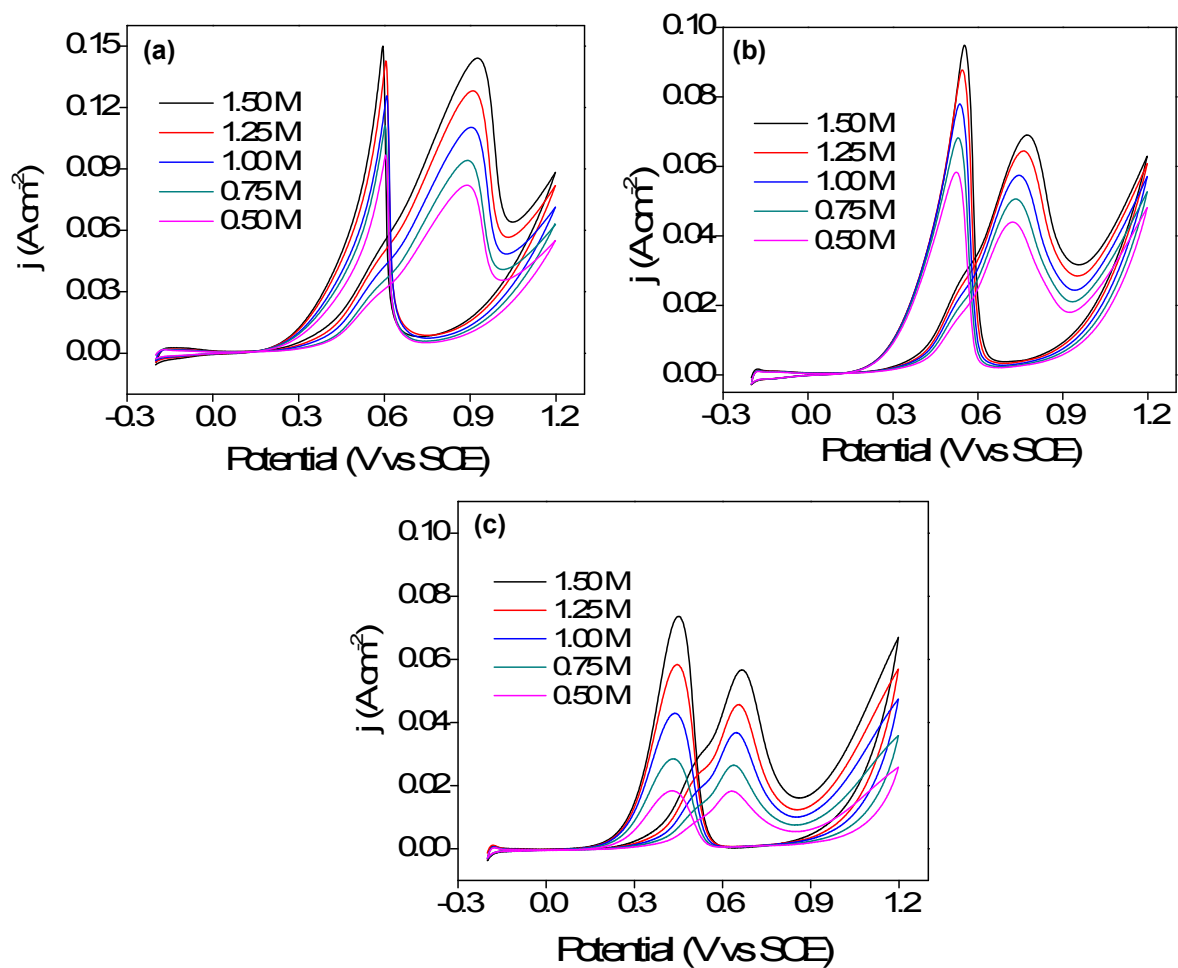

**Fig. S13**  $\text{CH}_3\text{OH}$  concentration effect on the MOR performance of (a)  $\text{Au}@/\text{CeO}_2@/\text{Pt}/\text{C}$ , (b)  $\text{CeO}_2@/\text{Pt}/\text{C}$  and (c)  $\text{Pt}/\text{C}$  electrodes at sweep rate of  $50 \text{ mV s}^{-1}$  at  $25^\circ\text{C}$ .

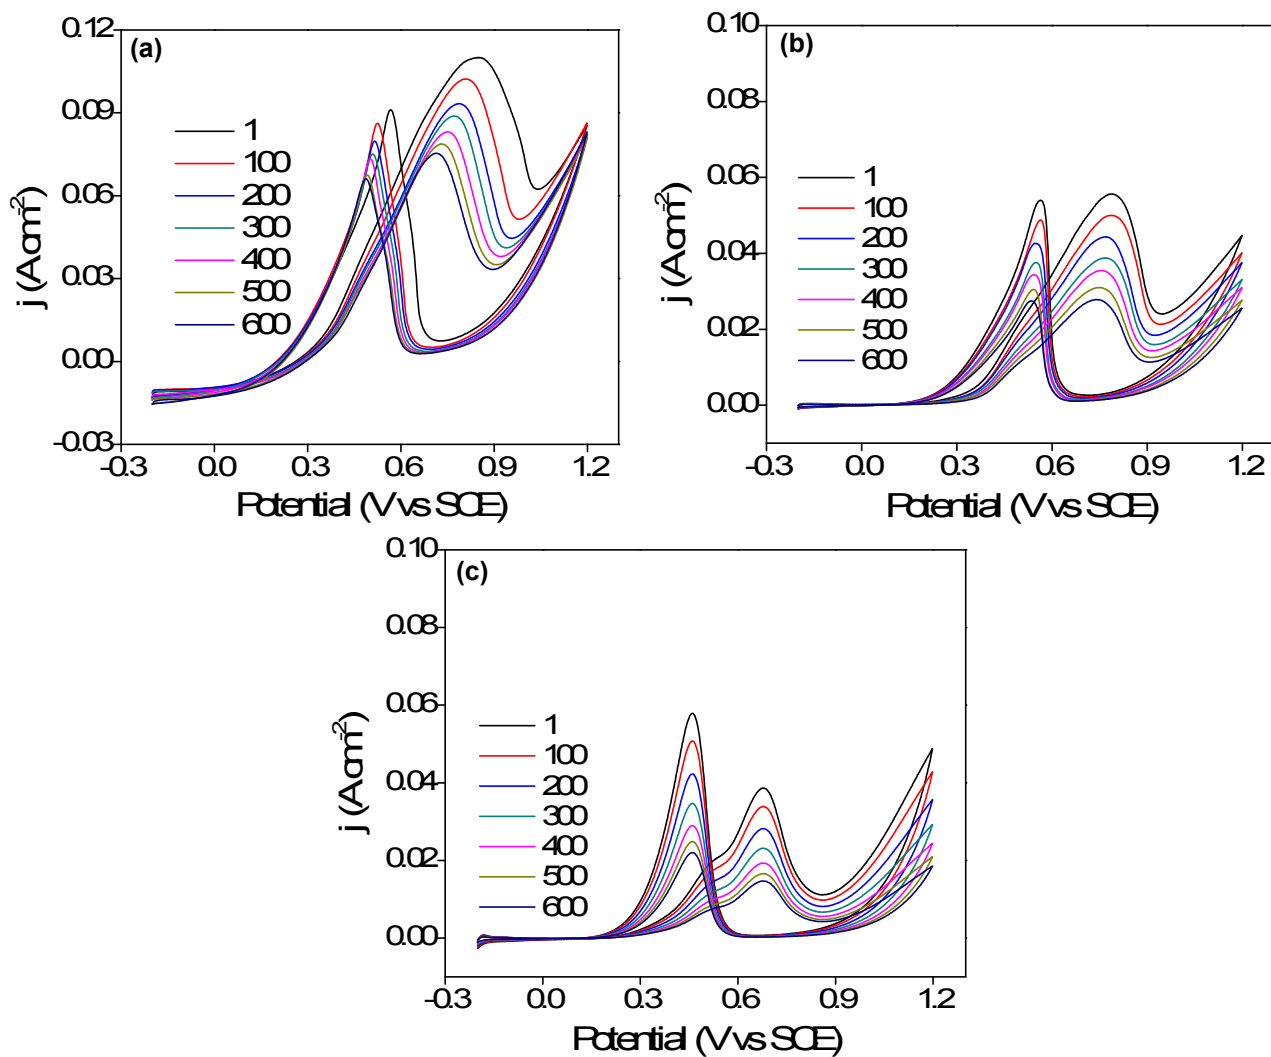

**Fig. S14** MOR durability test of (a)  $\text{Au@CeO}_2\text{/Pt/C}$ , (b)  $\text{CeO}_2\text{/Pt/C}$  and (c)  $\text{Pt/C}$  electrodes in  $N_2$ -saturated solution of  $0.25\text{ M H}_2\text{SO}_4 + 1\text{ M CH}_3\text{OH}$  at sweep rate of  $50\text{ mV s}^{-1}$  at  $25^\circ\text{C}$  during 600 sequential cycles.

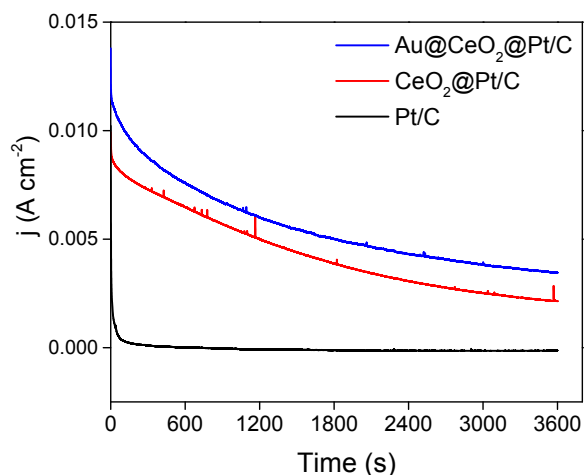

**Fig. S15** Chroamperometric curves of Au@CeO<sub>2</sub>@Pt/C, CeO<sub>2</sub>@Pt/C and Pt/C electrodes recorded in N<sub>2</sub>-saturated solution of 0.25 M H<sub>2</sub>SO<sub>4</sub> + 1 M CH<sub>3</sub>OH at potential of 0.8 V for 3600 s.

**Table S4** Comparison of electrocatalytic properties of different Pt-based catalysts for MOR activity

| Catalysts                                         | ECSA (m <sup>2</sup> /g <sub>Pt</sub> ) | Mass activity (mA/mg <sub>Pt</sub> ) | Sweep rate (mV/s) | Electrolyte                                                        | Ref.             |
|---------------------------------------------------|-----------------------------------------|--------------------------------------|-------------------|--------------------------------------------------------------------|------------------|
| <b>Au@CeO<sub>2</sub>@Pt/C</b>                    | <b>80.0</b>                             | <b>1,360</b>                         | <b>50</b>         | <b>0.25 M H<sub>2</sub>SO<sub>4</sub> and 1 M CH<sub>3</sub>OH</b> | <b>This work</b> |
| Pt/CeO <sub>2</sub> /PANI                         | 43.26                                   | 360                                  | 100               | 0.5 M H <sub>2</sub> SO <sub>4</sub> and 0.5 CH <sub>3</sub> OH    | 1                |
| Shuttle shape Pt/CeO <sub>2</sub>                 | 51.00                                   | 521                                  | 20                | 0.5 M H <sub>2</sub> SO <sub>4</sub> and 1 M CH <sub>3</sub> OH    | 2                |
| Pt <sub>3</sub> Pd <sub>1</sub> /CeO <sub>2</sub> | 30.33                                   | 853                                  | 50                | 0.1 M HClO <sub>4</sub> and 1 M CH <sub>3</sub> OH                 | 3                |
| 10 % Pt-Ru/CeO <sub>2</sub>                       | 134.8                                   | 140                                  | 20                | 0.5 M H <sub>2</sub> SO <sub>4</sub> and 1 M CH <sub>3</sub> OH    | 4                |
| Pt/CeO <sub>2</sub> (6:4)-RME                     | N.A.                                    | 647                                  | 50                | 0.5 M H <sub>2</sub> SO <sub>4</sub> and 1 M CH <sub>3</sub> OH    | 5                |
| Pt/CeO <sub>2</sub> /graphene                     | 75.6                                    | 366                                  | 100               | 0.5 M H <sub>2</sub> SO <sub>4</sub> and 1 M CH <sub>3</sub> OH    | 6                |
| Pt/CeO <sub>2</sub> /CNTs                         | 51.5                                    | 638                                  | 50                | 1 M HClO <sub>4</sub> and 1 M CH <sub>3</sub> OH                   | 7                |
| Pt <sub>0.89</sub> /SnO <sub>2</sub> /rGO         | 80.56                                   | 519                                  | 50                | 0.5 M H <sub>2</sub> SO <sub>4</sub> and 0.5 M CH <sub>3</sub> OH  | 8                |
| Pt/Ru/SnO <sub>2</sub> (2.6 nm)                   | N.A.                                    | 440                                  | 50                | 0.5 M H <sub>2</sub> SO <sub>4</sub> and 1 M CH <sub>3</sub> OH    | 9                |
| Pt/SnO <sub>2</sub> /GNs                          | 92.80                                   | 670                                  | 100               | 0.5 M H <sub>2</sub> SO <sub>4</sub> and 1 M CH <sub>3</sub> OH    | 10               |
| Pt/WO <sub>3</sub>                                | N.A.                                    | 207                                  | 50                | 0.5 M H <sub>2</sub> SO <sub>4</sub> and 1 M CH <sub>3</sub> OH    | 11               |
| Pt/WO <sub>3</sub> /C-1                           | 76.40                                   | 254                                  | 20                | 0.5 M H <sub>2</sub> SO <sub>4</sub> and 1 M CH <sub>3</sub> OH    | 12               |
| m-10Pt/WO <sub>3</sub>                            | N.A.                                    | 706                                  | 50                | 0.5 M H <sub>2</sub> SO <sub>4</sub> and 0.5 M CH <sub>3</sub> OH  | 13               |
| Pt/HTiO <sub>2</sub> @N-HPCN-                     | 74.80                                   | 695                                  | 50                | 0.5 M H <sub>2</sub> SO <sub>4</sub> and 1 M CH <sub>3</sub> OH    | 14               |

800

|                                      |        |       |       |                                                                   |    |
|--------------------------------------|--------|-------|-------|-------------------------------------------------------------------|----|
| PtBi nanoplates                      | 33.9   | 1,100 | N.A.* | 0.1 M HClO <sub>4</sub> and 0.1 M CH <sub>3</sub> OH              | 15 |
| PtRu NWs                             | 72.1   | 820   | 50    | 0.1 M HClO <sub>4</sub> and 0.5 M CH <sub>3</sub> OH              | 16 |
| AgAu@Pt                              | 24.60  | 483   | 50    | 0.2 M KOH and 1 M CH <sub>3</sub> OH                              | 17 |
| Pt/NiCo-LDH/NF                       | 131.86 | 379   | 50    | 0.1 M NaOH and 0.5 M CH <sub>3</sub> OH                           | 18 |
| Pt/NiFe-LDH/RGO                      | 24.60  | 949   | 100   | 1 M KOH and 1 M CH <sub>3</sub> OH                                | 19 |
| PtFe                                 | 15.17  | 537   | 50    | 0.5 M H <sub>2</sub> SO <sub>4</sub> and 1 M CH <sub>3</sub> OH   | 20 |
| Pt/graphene                          | 51.0   | 300   | 50    | 0.5 M H <sub>2</sub> SO <sub>4</sub> and 2 M CH <sub>3</sub> OH   | 21 |
| Pt/[BMIM]BF <sub>4</sub> /CNT        | N.A.*  | 155   | 50    | 0.5 M H <sub>2</sub> SO <sub>4</sub> and 1 M CH <sub>3</sub> OH   | 22 |
| Pt/N-doped graphene                  | N.A.   | 400   | 200   | 0.5 M H <sub>2</sub> SO <sub>4</sub> and 1 M CH <sub>3</sub> OH   | 23 |
| PtAu/N-doped graphene                | 60.9   | 417.0 | 50    | 0.5 M H <sub>2</sub> SO <sub>4</sub> and 0.5 M CH <sub>3</sub> OH | 24 |
| Pt/B-doped graphene                  | 58.8   | 410.0 | 50    | 0.5 M H <sub>2</sub> SO <sub>4</sub> and 0.5 M CH <sub>3</sub> OH | 25 |
| Pt/N-doped graphene                  | 64.6   | 390.0 | 20    | 1 M H <sub>2</sub> SO <sub>4</sub> and 2 M CH <sub>3</sub> OH     | 26 |
| Pt/mesoporous carbon                 | N.A.   | 450.0 | 20    | 0.5 M H <sub>2</sub> SO <sub>4</sub> and 1 M CH <sub>3</sub> OH   | 27 |
| Pt/macroporous carbon                | N.A.   | 81.6  | 50    | 0.5 M H <sub>2</sub> SO <sub>4</sub> and 0.5 M CH <sub>3</sub> OH | 28 |
| Pt/N-doped carbon                    | 24.6   | 343.0 | 50    | 0.5 M H <sub>2</sub> SO <sub>4</sub> and 1 M CH <sub>3</sub> OH   | 29 |
| Pt/G <sub>3</sub> -(CN) <sub>7</sub> | 60.0   | 612.8 | 20    | 1 M H <sub>2</sub> SO <sub>4</sub> and 2 M CH <sub>3</sub> OH     | 30 |

\*N.A. was not applicable.

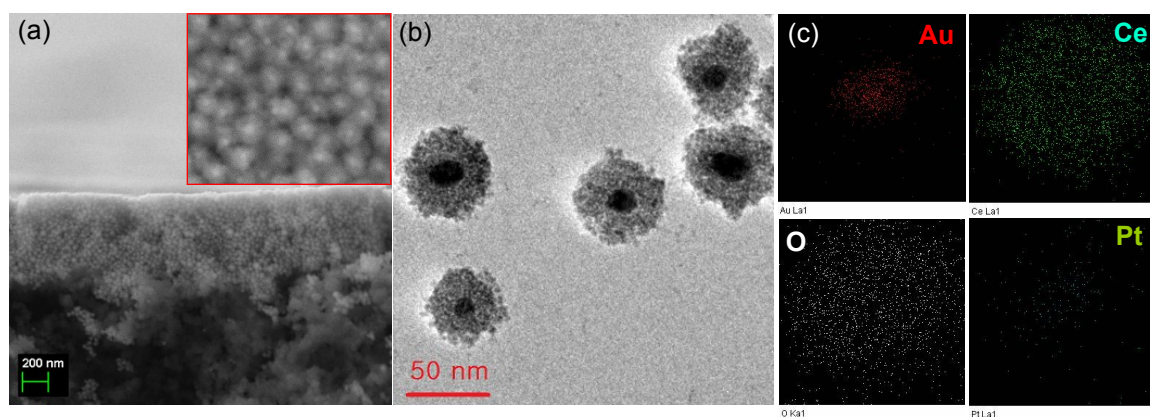

**Fig. S16** FESEM and HRTEM analysis confirmation of as-used Au@CeO<sub>2</sub>@Pt/C electrode after 600 sequential cycles of the MOR stability test: (a) FESEM cross-section observation, inset giving the surface image, (b) HRTEM image and (c) corresponding HRTEM mapping analysis.



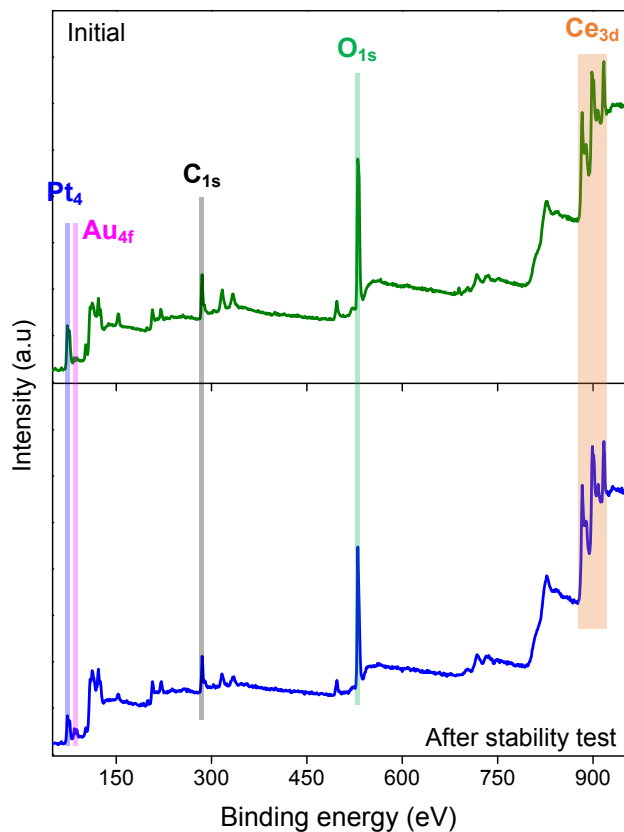

**Fig. S17** XPS measurements of Au@CeO<sub>2</sub>@Pt catalyst at initial and after MOR stability tests.

The content comparisons of Au@CeO<sub>2</sub>@Pt catalyst components (Au 4f, Ce 3d, O 1s and Pt 4f) at initial and after MOR repetitive stability tests (**Fig. S17**) are performed and summarised in **Table S5**.

**Table S5** XPS analysis of Au@CeO<sub>2</sub>@Pt catalyst before and after 600 sequential cycles of the MOR stability test

| Au@CeO <sub>2</sub> @Pt | Au <sup>0</sup><br>(%) | Au <sup>+</sup><br>(%) | Ce <sup>3+</sup><br>(%) | Ce <sup>4+</sup><br>(%) | O <sub>L</sub><br>(%) | O <sub>V</sub><br>(%) | O <sub>C</sub><br>(%) | Pt <sup>0</sup><br>(%) | Pt <sup>2+</sup><br>(%) |
|-------------------------|------------------------|------------------------|-------------------------|-------------------------|-----------------------|-----------------------|-----------------------|------------------------|-------------------------|
| Initial                 | 87.98                  | 12.02                  | <b>30.03</b>            | 69.97                   | 54.20                 | <b>26.46</b>          | 19.34                 | <b>84.36</b>           | 15.64                   |
| After stability         | 87.67                  | 12.33                  | <b>28.76</b>            | 71.24                   | 58.52                 | <b>23.35</b>          | 18.13                 | <b>83.51</b>           | 16.49                   |

## References

- 1) H. Xu, et al, *ACS Catal.*, 2016, **6**, 5198.
- 2) S.K. Meher, et al, *ACS Catal.*, 2012, **2**, 2795.
- 3) A.B. Yousaf, et al, *J. Phys. Chem. C*, 2017, **121**, 2069.
- 4) Z. Sun, et al, *Langmuir*, 2010, **26**, 12383.
- 5) E. Lee, A. Manthiram, *J. Phys. Chem. C*, 2010, **114**, 21833.
- 6) X. Wang, et al, *Chem. Commun.*, 2012, **48**, 2885.
- 7) J. Wang, et al, *J. Power Sources*, 2007, **164**, 555.
- 8) S. Wu, et al, *Nano Energy*, 2016, **26**, 699.
- 9) S. Yang, et al, *J. Mater. Chem.*, 2012, **22**, 7104.
- 10) F. Lei, et al, *Int. J. Hydrogen Energy*, 2016, **41**, 255.
- 11) J. Mateos-Santiago, et al, *Ind. Eng. Chem. Res.*, 2017, **56**, 161.
- 12) Z. Cui, et al, *J. Power Sources*, 2011, **196**, 2621.
- 13) X. Cui, et al, *J. Phys. Chem. B*, 2008, **112**, 12024.
- 14) J. Zhang, et al, *ACS Appl. Energy Mater.*, 2018, **1**, 2758.
- 15) Y. Qin, et al, *ACS Catal.*, 2018, **8**, 5581.
- 16) L. Huang, *J. Am. Chem. Soc.*, 2018, **140**, 1142.
- 17) X. Yan, et al, *Nanoscale*, 2018, **10**, 2231.
- 18) F. Yang, et al, *Int. J. Hydrogen Energy*, 2018, **43**, 16302.
- 19) Z. Wang, et al, *J. Electroanal. Chem.*, 2018, **818**, 198.
- 20) X. Zhang, et al, *CrystEngComm.*, 2018, **20**, 4277.
- 21) S.M. Choi, et al, *Carbon*, 2011, **49**, 904.
- 22) H. Chu, et al, *Adv. Funct. Mater.*, 2010, **20**, 3747.
- 23) B. Xiong, et al, *Carbon*, 2013, **52**, 181.
- 24) G. Yang, et al, *J. Mater. Chem. A*, 2013, **1**, 1754.
- 25) Y. Sun, et al, *J. Power Sources*, 2015, **300**, 245.
- 26) H. Huang, et al, *J. Mater. Chem. A*, 2015, **3**, 19696.
- 27) H. Jiang, et al, *Chem. Commun.*, 2011, **47**, 8590.
- 28) X. Bo, et al, *Electrochim. Acta*, 2013, **90**, 283.
- 29) F. Su, et al, *Chem. Mater.*, 2010, **22**, 832.
- 30) H.J. Huang, et al, *Adv. Mater.*, 2014, **26**, 5160.
